# Supplementary material for: Dietary Supplementation with Boswellia serrata, Verbascum thapsus, and Curcuma longa in Show Jumping Horses: Effects on Serum Proteome, Antioxidant Status, and Anti-Inflammatory Gene Expression
Source: MDPI journal article supplement (doi:10.3390/life13030750), 2023-03-10
Supplement: s1 [file s1]

| Concentrate   | %      |
|---------------|--------|
| Moisture      | 12.50% |
| DE kcal       | 2890   |
| Crude protein | 14.00% |
| Crude fat     | 3.00 % |
| Crude fiber   | 14.00% |
| Ash           | 9.00%  |
| Calcium       | 1.20%  |
| Phosphorus    | 0.60%  |

**Table S1.** Composition of concentrate.

| Additives               |       |      |
|-------------------------|-------|------|
| Vitamin A               | 30000 | U.I. |
| Vitamin D <sub>3</sub>  | 2000  | U.I. |
| Vitamin E               | 30    | mg   |
| Vitamin K               | 0.8   | mg   |
| Vitamin B <sub>1</sub>  | 2     | mg   |
| Vitamin B <sub>2</sub>  | 1     | mg   |
| Vitamin B <sub>12</sub> | 0.01  | mg   |
| Vitamin PP              | 130   | mg   |
| Pantotenic<br>Acid      | 0.8   | mg   |
| Iron                    | 50    | mg   |
| Manganese               | 50    | mg   |
| Copper                  | 30    | mg   |
| Zinc                    | 80    | mg   |
| Iodine                  | 2.0   | mg   |
| Organic<br>Selenium     | 0.1   | mg   |
| Lysine                  | 7000  | mg   |
| Methionine              | 2500  | mg   |

**Table S2.** Additives for kg of concentrate.

The feeding ration was comprised of grass hay (first-cut), administered two or three times a day, and 3-3.5 kg of concentrate administered two times/day. The feeding ration might have been slightly varied according to the animal's requirement.
